# Supplementary material for: Resins for Frontal Photopolymerization: Combining Depth-Cure and Tunable Mechanical Properties
Source: MDPI journal article supplement (doi:10.3390/ma14040743), 2021-02-05
Supplement: s1 [file s1]

*Supplementary Materials*

# Resins for Frontal Photopolymerization: Combining Depth-Cure and Tunable Mechanical Properties

Catharina Ebner, Julia Mitterer, Joamin Gonzalez-Gutierrez, Gisbert Rieß and Wolfgang Kern

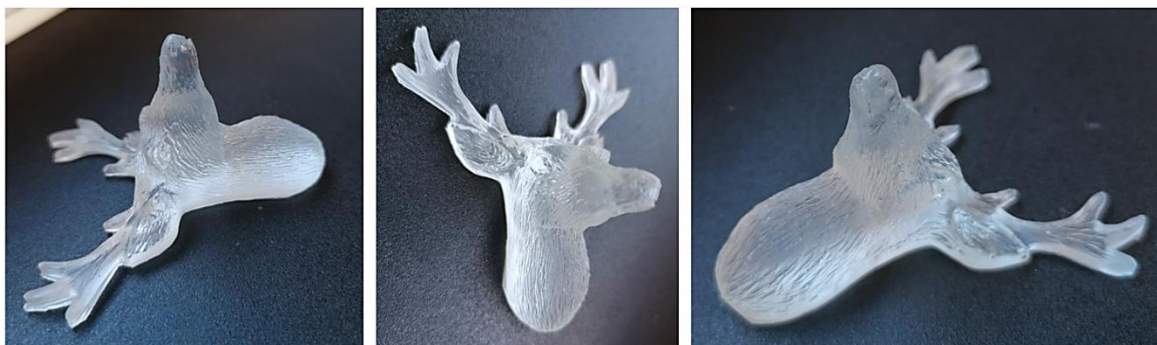

**Figure S1.** Photofrontally cured specimen with complex surface pattern and 3.0 cm depth, fabricated from 35 g of FPP resin R-2900\_50.

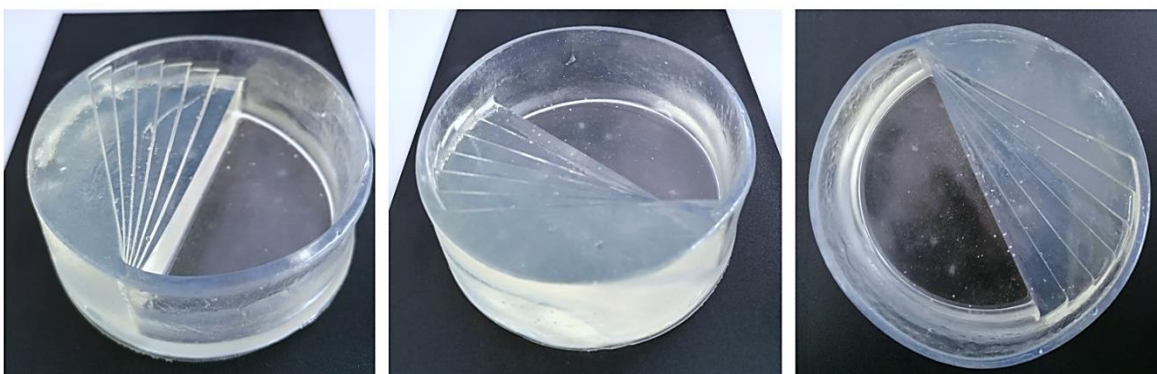

**Figure S2.** A total mass of 267 g resin polymerized via light induction only. The circular silicone mold of 13 cm diameter and 5.5 cm depth was extremely soft and flexible, so that the specimen is rather oval.
